# Supplementary material for: The mechanism of organic radical oxidation catalysed by gold nanoparticles
Source: Royal Society of Chemistry journal article supplement (doi:10.1039/d1cp03875c), 2021-01-01
Supplement: d1cp03875c1.pdf [file d1cp03875c1.pdf]

## SUPPORTING INFORMATION

### Mechanism of organic radicals' oxidation catalyzed by gold nanoparticles

Viacheslav Shcherbakov, Sergey A. Denisov, Mehran Mostafavi

Institute de Chimie Physique (ICP), CNRS/Université Paris-Saclay, 91405 Orsay, France

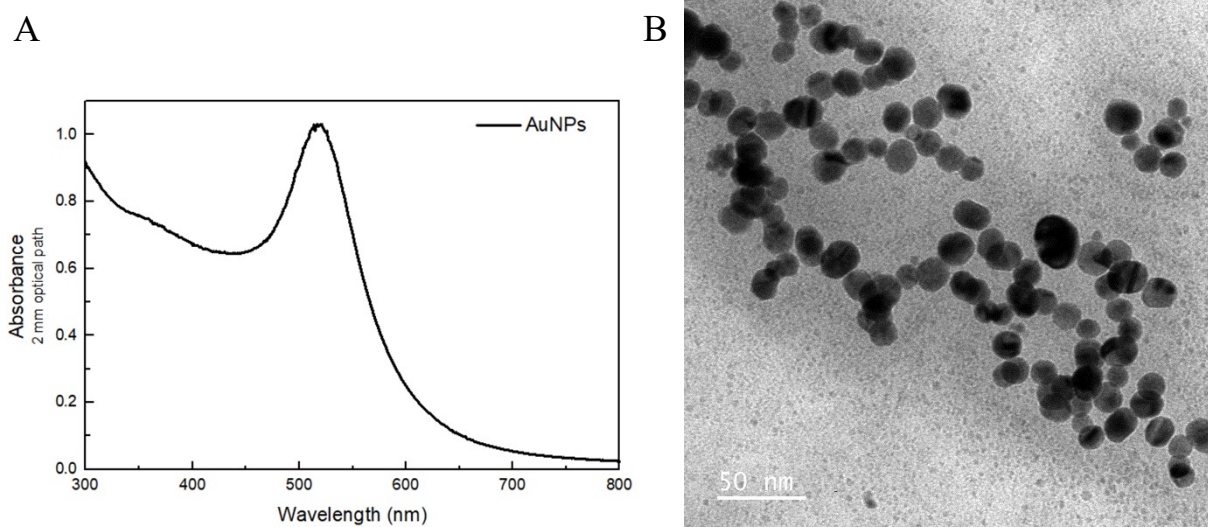

Figure S1. A - UV-vis absorption spectrum of AuNPs suspension containing 3 mM of gold atoms. The suspension was diluted two times with deionized water. B – TEM image of AuNPs.

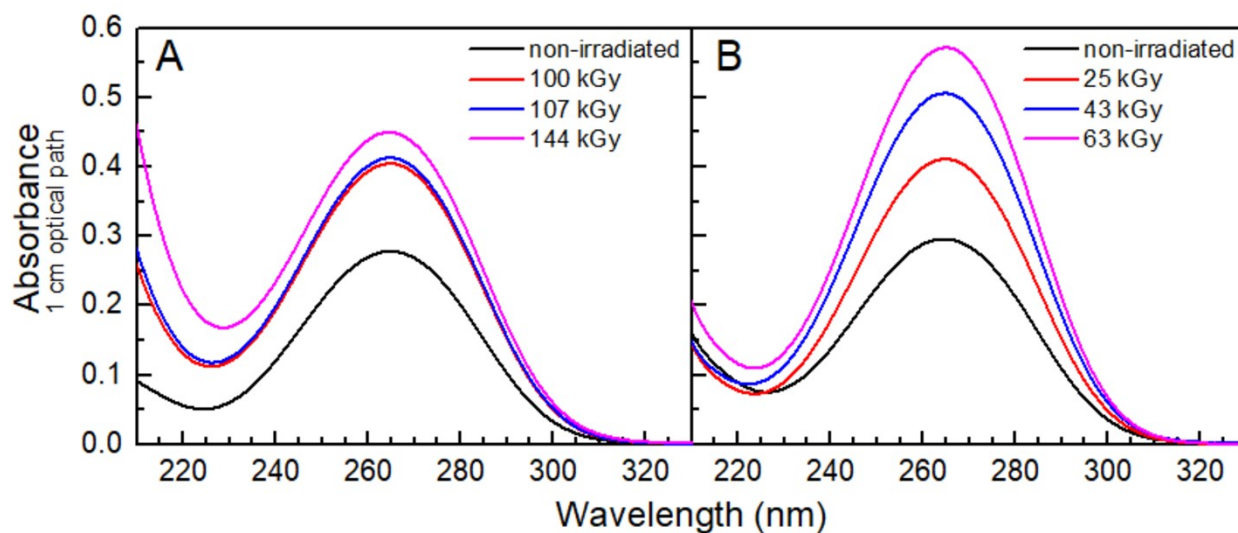

Figure S2. Evolution of UV-vis absorption spectra after different dose deposition of samples containing 100 mM of 2-propanol and 20 mM of acetone in the supernatant (A) and AuNPs suspension containing 3 mM of gold atoms (B). All samples were deoxygenated with Ar.

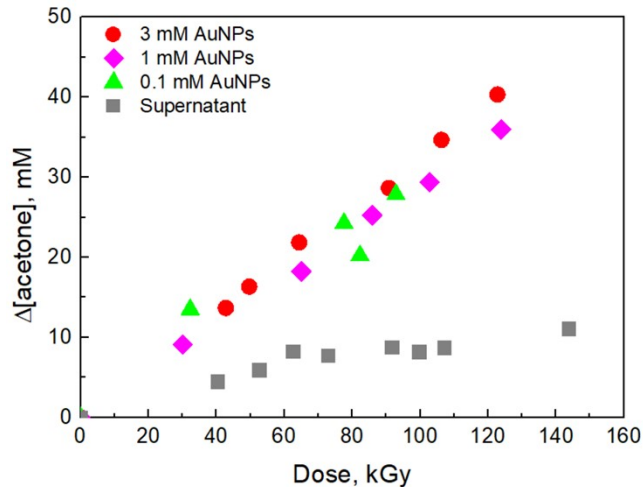

Figure S3. Acetone formation in AuNPs' suspension at different concentration. All solutions contain 100 mM of 2-propanol, 20 mM of acetone and deoxygenated by Ar gas.

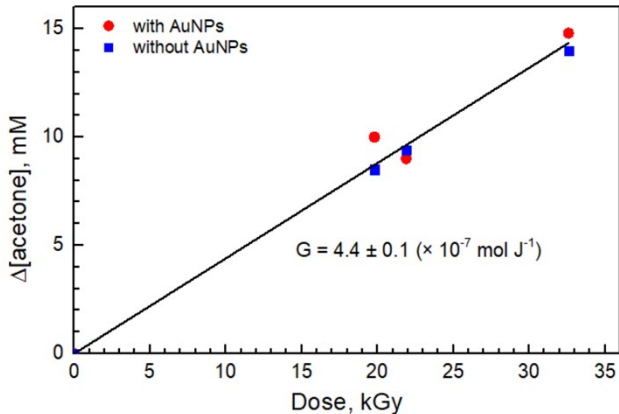

Figure S4. Acetone formation under irradiation by electron accelerator ELYSE (dose rate  $\sim 10^{13} \text{ Gy s}^{-1}$ ). Irradiated solutions contained 100 mM of 2-propanol and were continuously bubbled with  $\text{N}_2\text{O}$ .

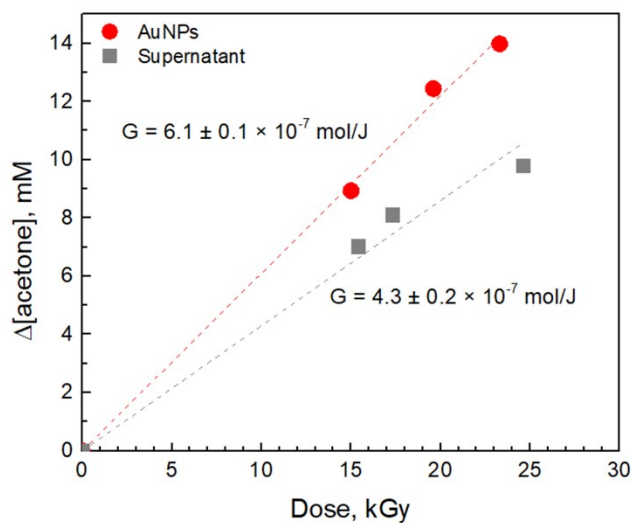

Figure S5. Acetone formation in the AuNPs' suspension (3 mM) and the supernatant containing 100 mM of 2-propanol, deoxygenated with N<sub>2</sub>O and irradiated by gamma rays at various doses.

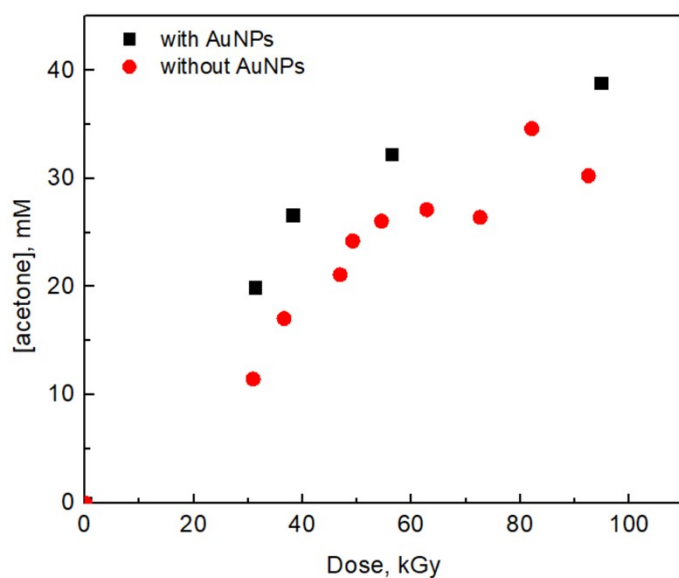

Figure S6. Acetone formation in AuNPs' suspension (red dots) and its supernatant (black squares) under gamma radiation. Both solutions were oxygen saturated and contained 100 mM of 2-propanol and 20 mM of acetone.

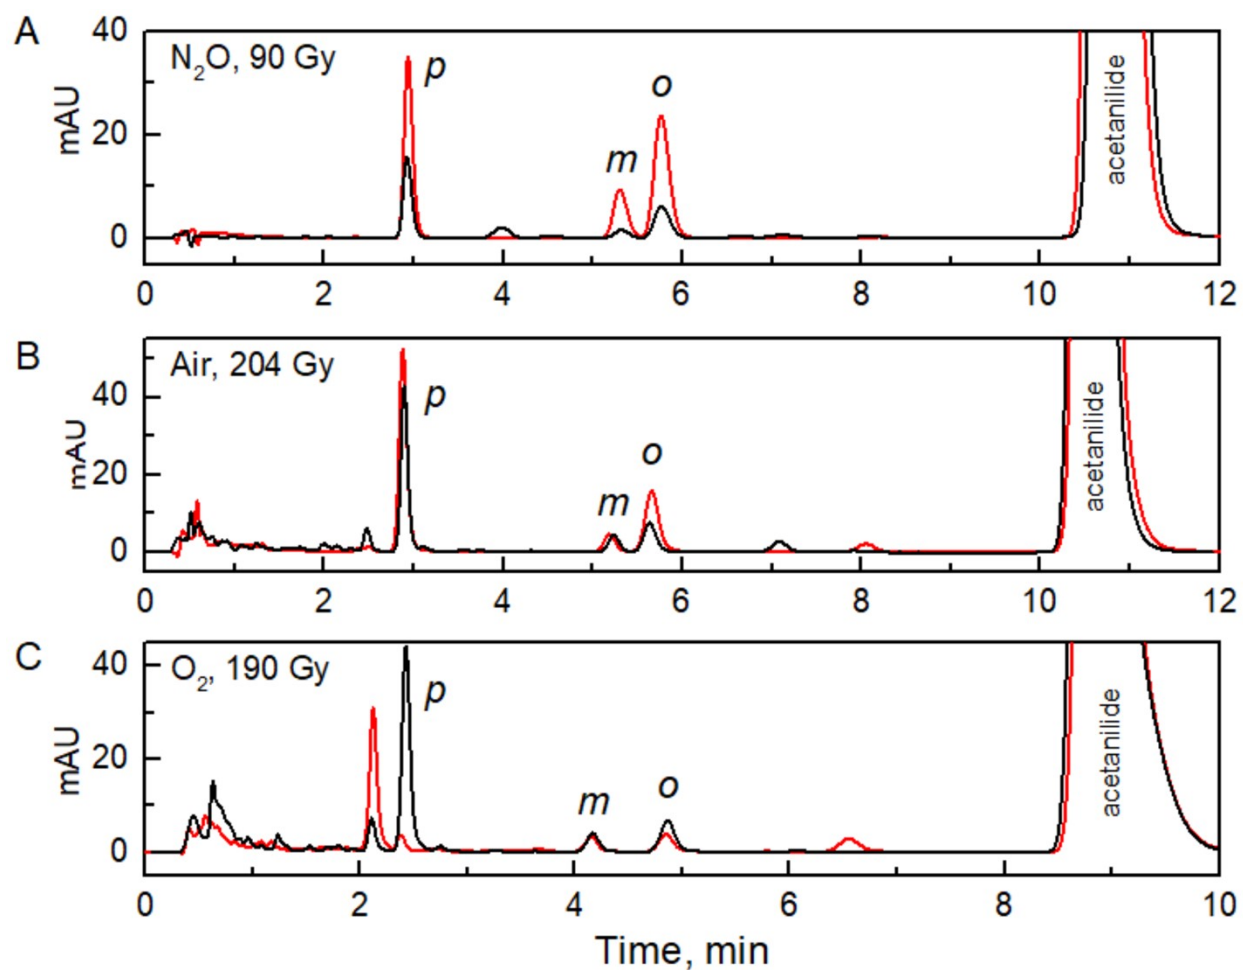

Figure S7. HPLC profiles samples irradiated by gamma rays (<sup>60</sup>Co) under different atmospheres. Black lines represent 0.5 mM acetanilide aqueous solution; red lines represent 0.5 mM of acetanilide in 1.5 mM AuNPs suspension. A – samples irradiated under N<sub>2</sub>O at 90 Gy, B - samples irradiated under air at 204 Gy, and C - samples irradiated under O<sub>2</sub> at 190 Gy. *p*, *m*, and *o* is para-, meta-, and ortho-acetamidophenol respectively.

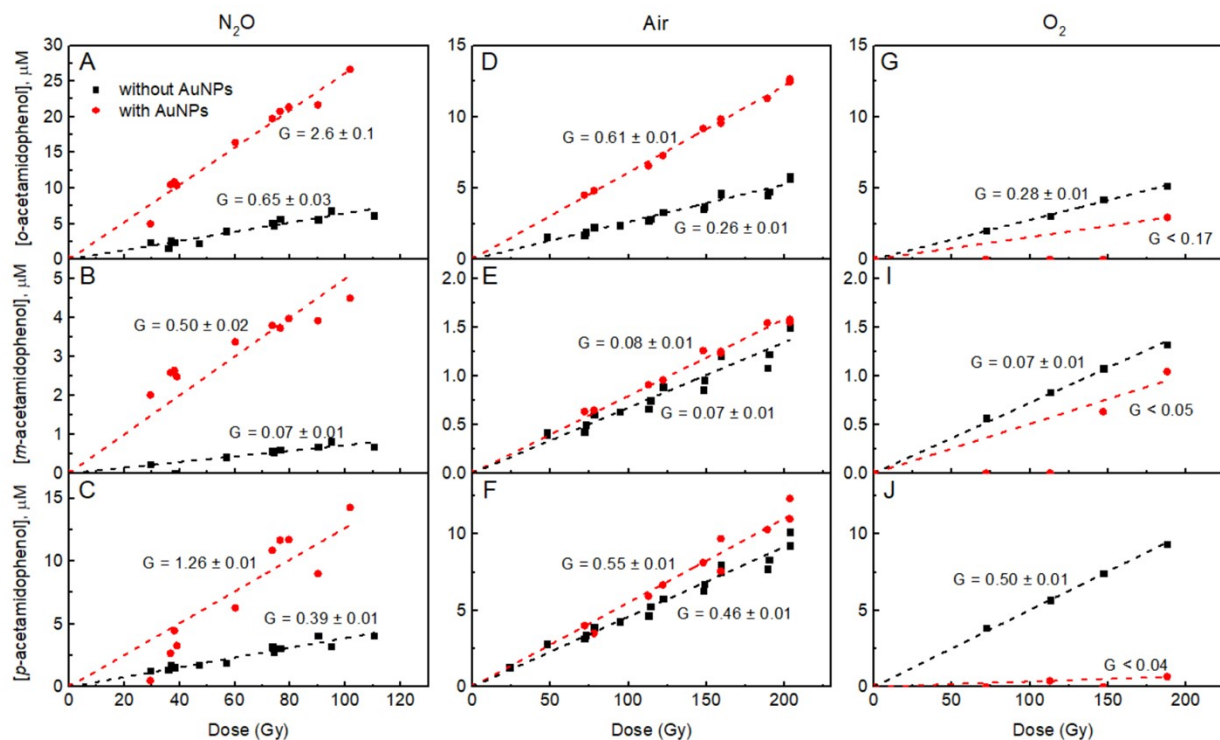

Figure S8. Formation of o-, m-, and p-acetamidophenol in water radiolysis ( $^{60}\text{Co}$ ) of 0.5 mM acetanilide aqueous solution (black squares) and in the presence of 1.5 mM of AuNPs (red dots) under three different atmospheres.  $G$  is a radiolytic yield ( $\times 10^{-7} \text{ mol J}^{-1}$ ).
